# Supplementary material
Source: Research Square preprint supplement (doi:10.21203/rs.3.rs-8862141/v1)
Supplement: Supplementary file 1 [file b9f3eacfa91c71fda8641b51.docx]

**A AIE probe for visual monitoring of endogenous and exogenous H2S and food freshness**

Rongqi Wanga,d,# Si Chenb,# Ymin Lie, Tuotuo Fangd, Zhan-Bin Jinc, Ting-Ting Weic, Jia-Ping Lic, Hai-Xian Renc, Zi-Ao Zongb,*, Na-Na Lib, c,*

a Center for Medical Laboratory Science, Affiliated Hospital of Youjiang Medical University for Nationalities, Baise, Guangxi, 533000, China

b Modern Industrial College of Biomedicine and Great Health, Youjiang Medical University for Nationalities, Baise, 533000, Guangxi, PR China

c Department of Chemistry, Xinzhou Normal University, Xinzhou, Shanxi 034000, PR China

d ZhongKe (Guangdong) Refinery & Petrochemical Company Limited, Zhanjiang, Guangdong 524000, PR China

e College of Chemistry and Environment, Guangdou Ocean University, Zhanjiang, Guangdong 524088, PR China

#Rongqi Wangand Si Chen are co-first authors

Corresponding author: [zongziao@126.com](mailto:zongziao@126.com) (Z.-A Z); lmt13643562571@126.com (N.-N L)

**Fig. S1.** 1H NMR (DMSO-*d*6, 600 MHz) spectra of **EHAT**.

**Fig. S2.** 13C NMR (DMSO-*d*6, 600 MHz) spectra of **EHAT**.


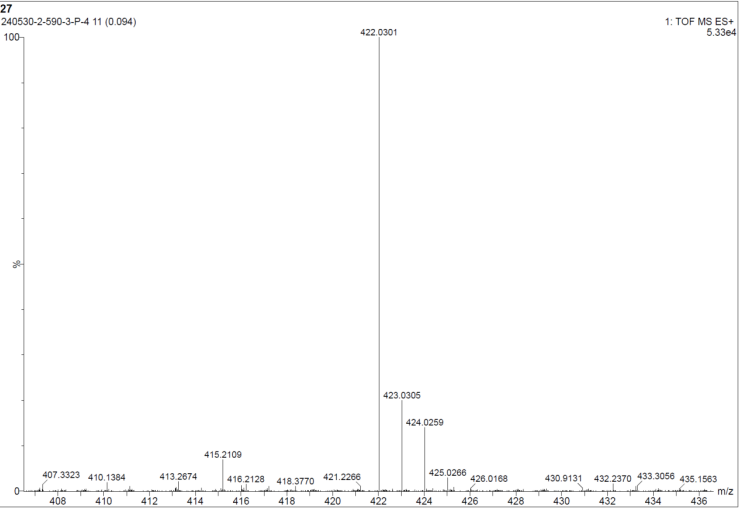


[EHAT+H+]

**Fig. S3.** ESI-MS spectrum of **EHAT**.


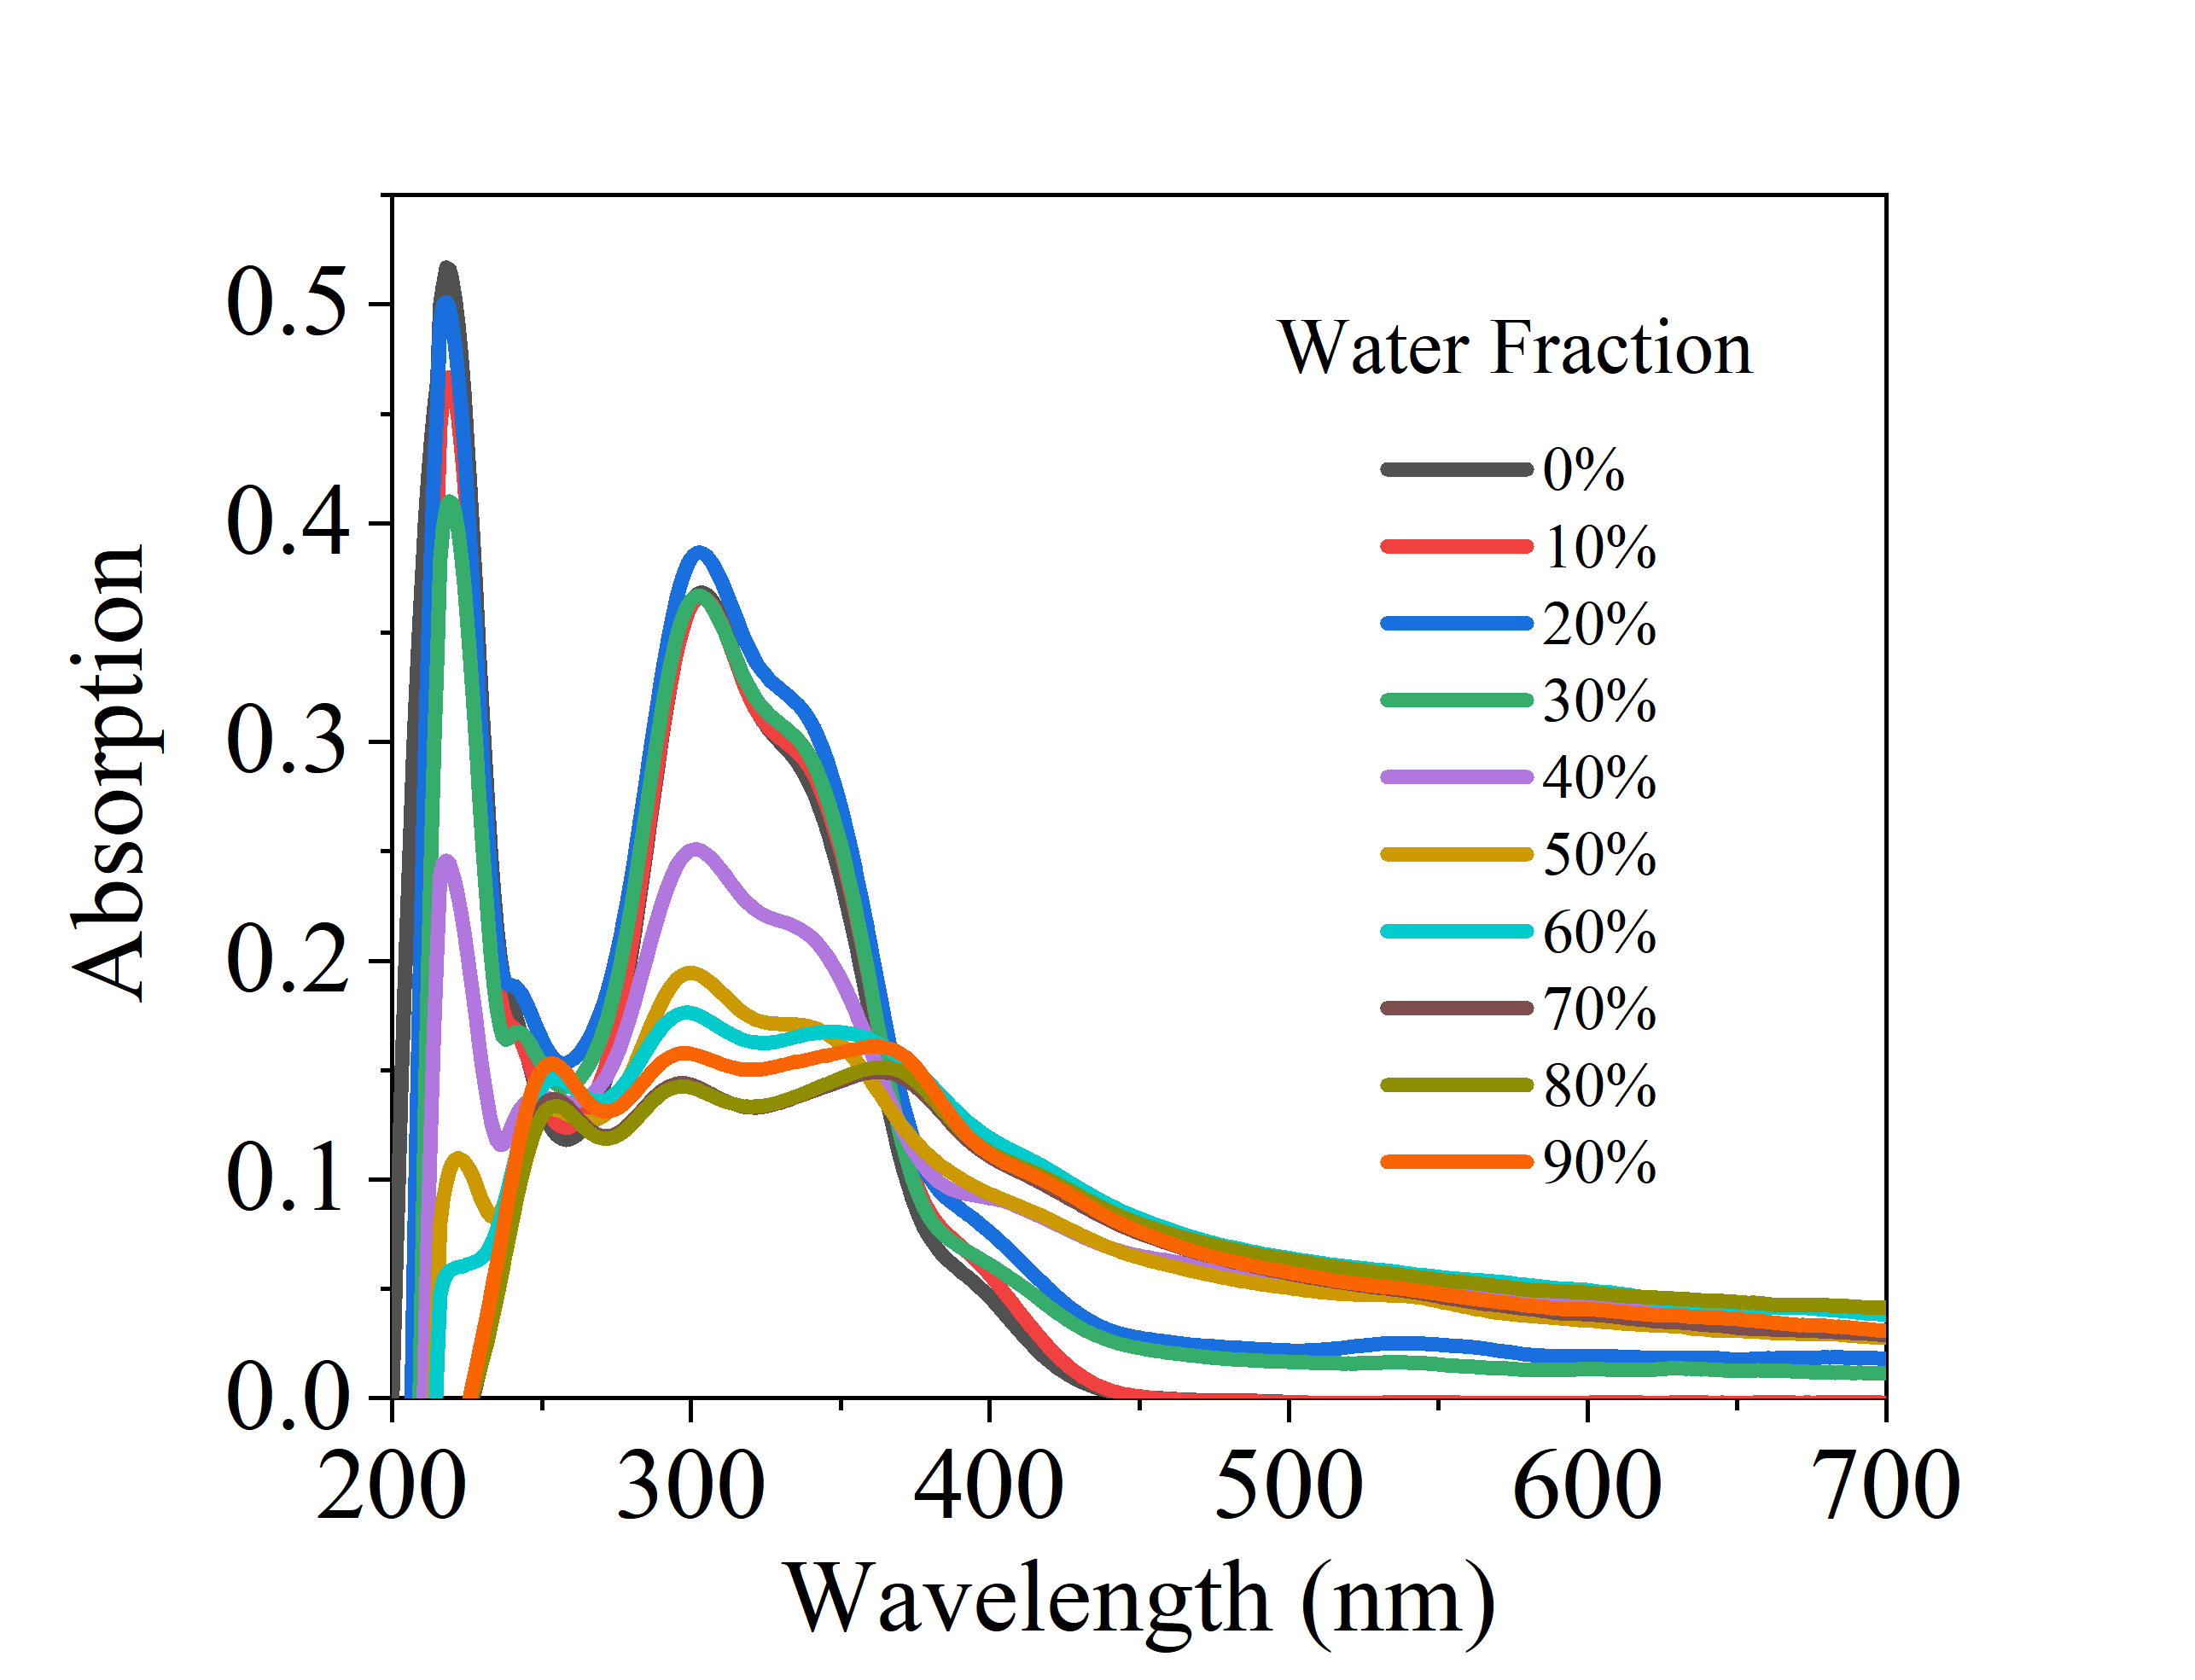


**Fig. S4.** The UV-vis absorption spectra of **EHAT** (10 µM) in EtOH/H2O mixtures with different fractions of water.


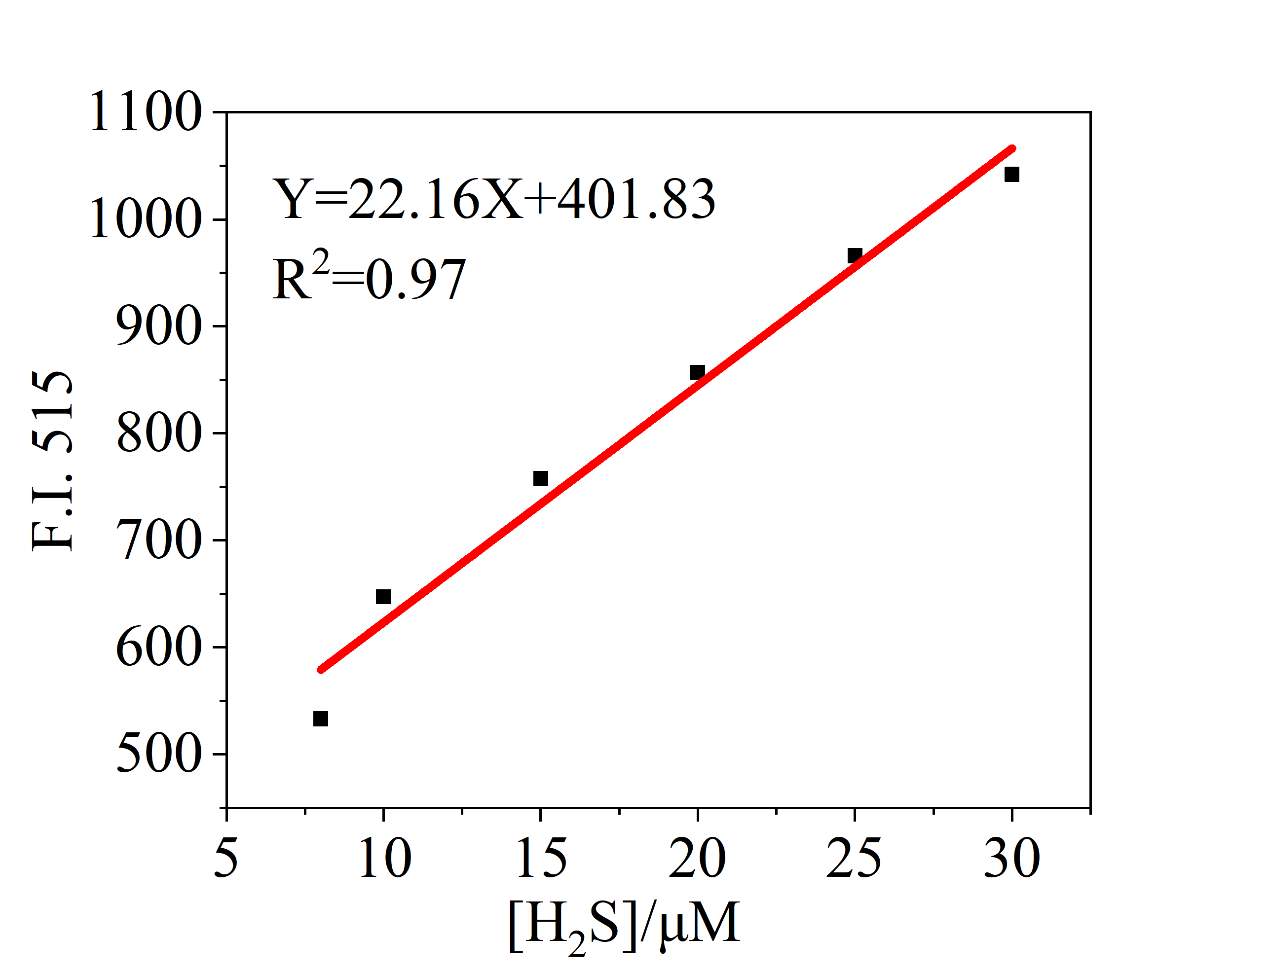


**Fig. S5.** Plot of fluorescence intensity value at 515 nm versus the number of equiv. of H2S added.


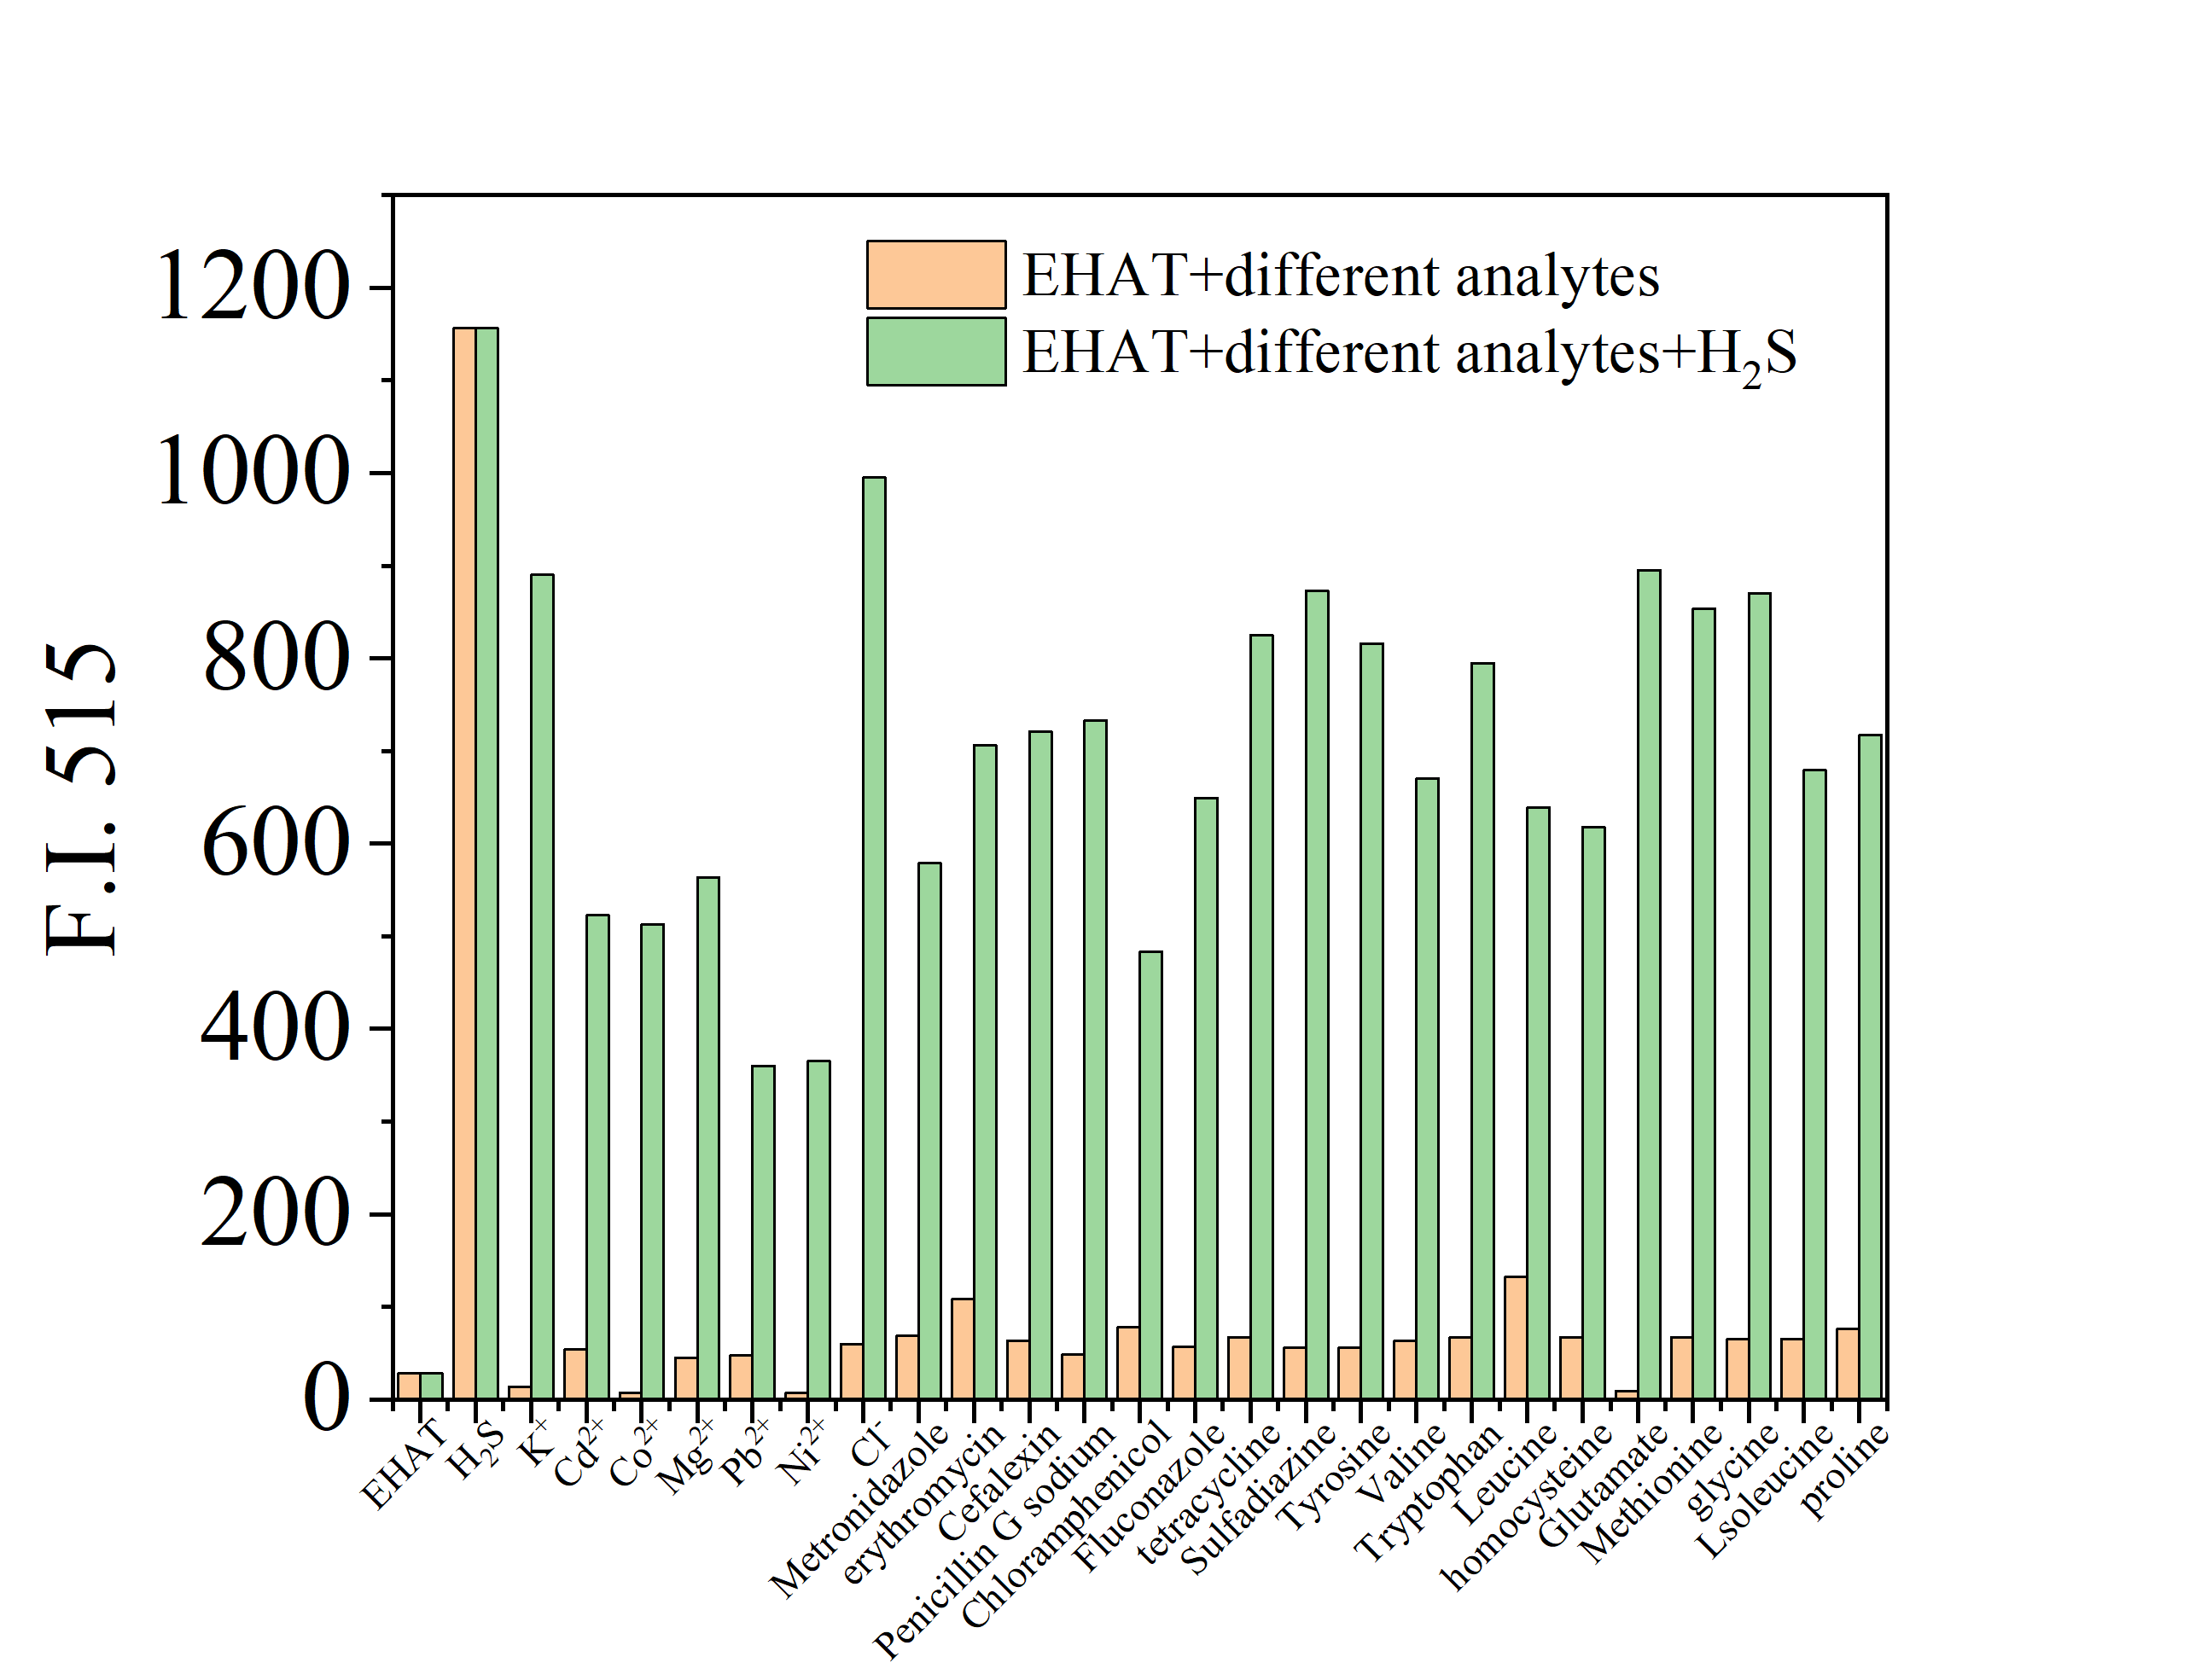


**Fig. S6.** The Fluorescence spectra of **HNMT** (10 µM) upon addition of various analytes (50 µM) in presence of H2S (50 µM) in EtOH/H2O (1/9, V/V, pH=7.4) medium.


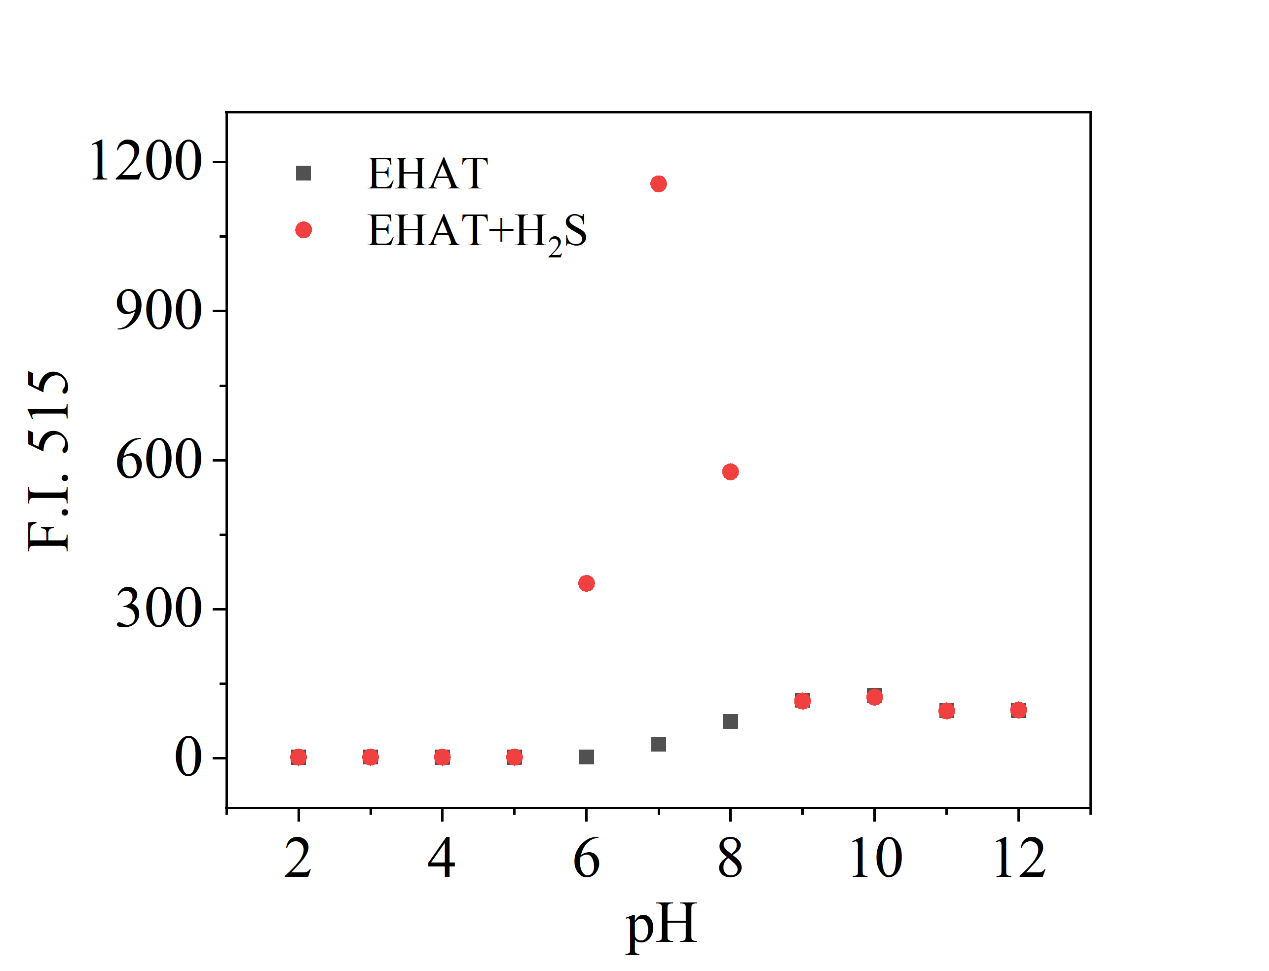


**Fig. S7.** Fluorescence intensity of **EHAT** (10 μM) at 515 nm in the absence and presence of H2S (5 equiv) at various pH values.


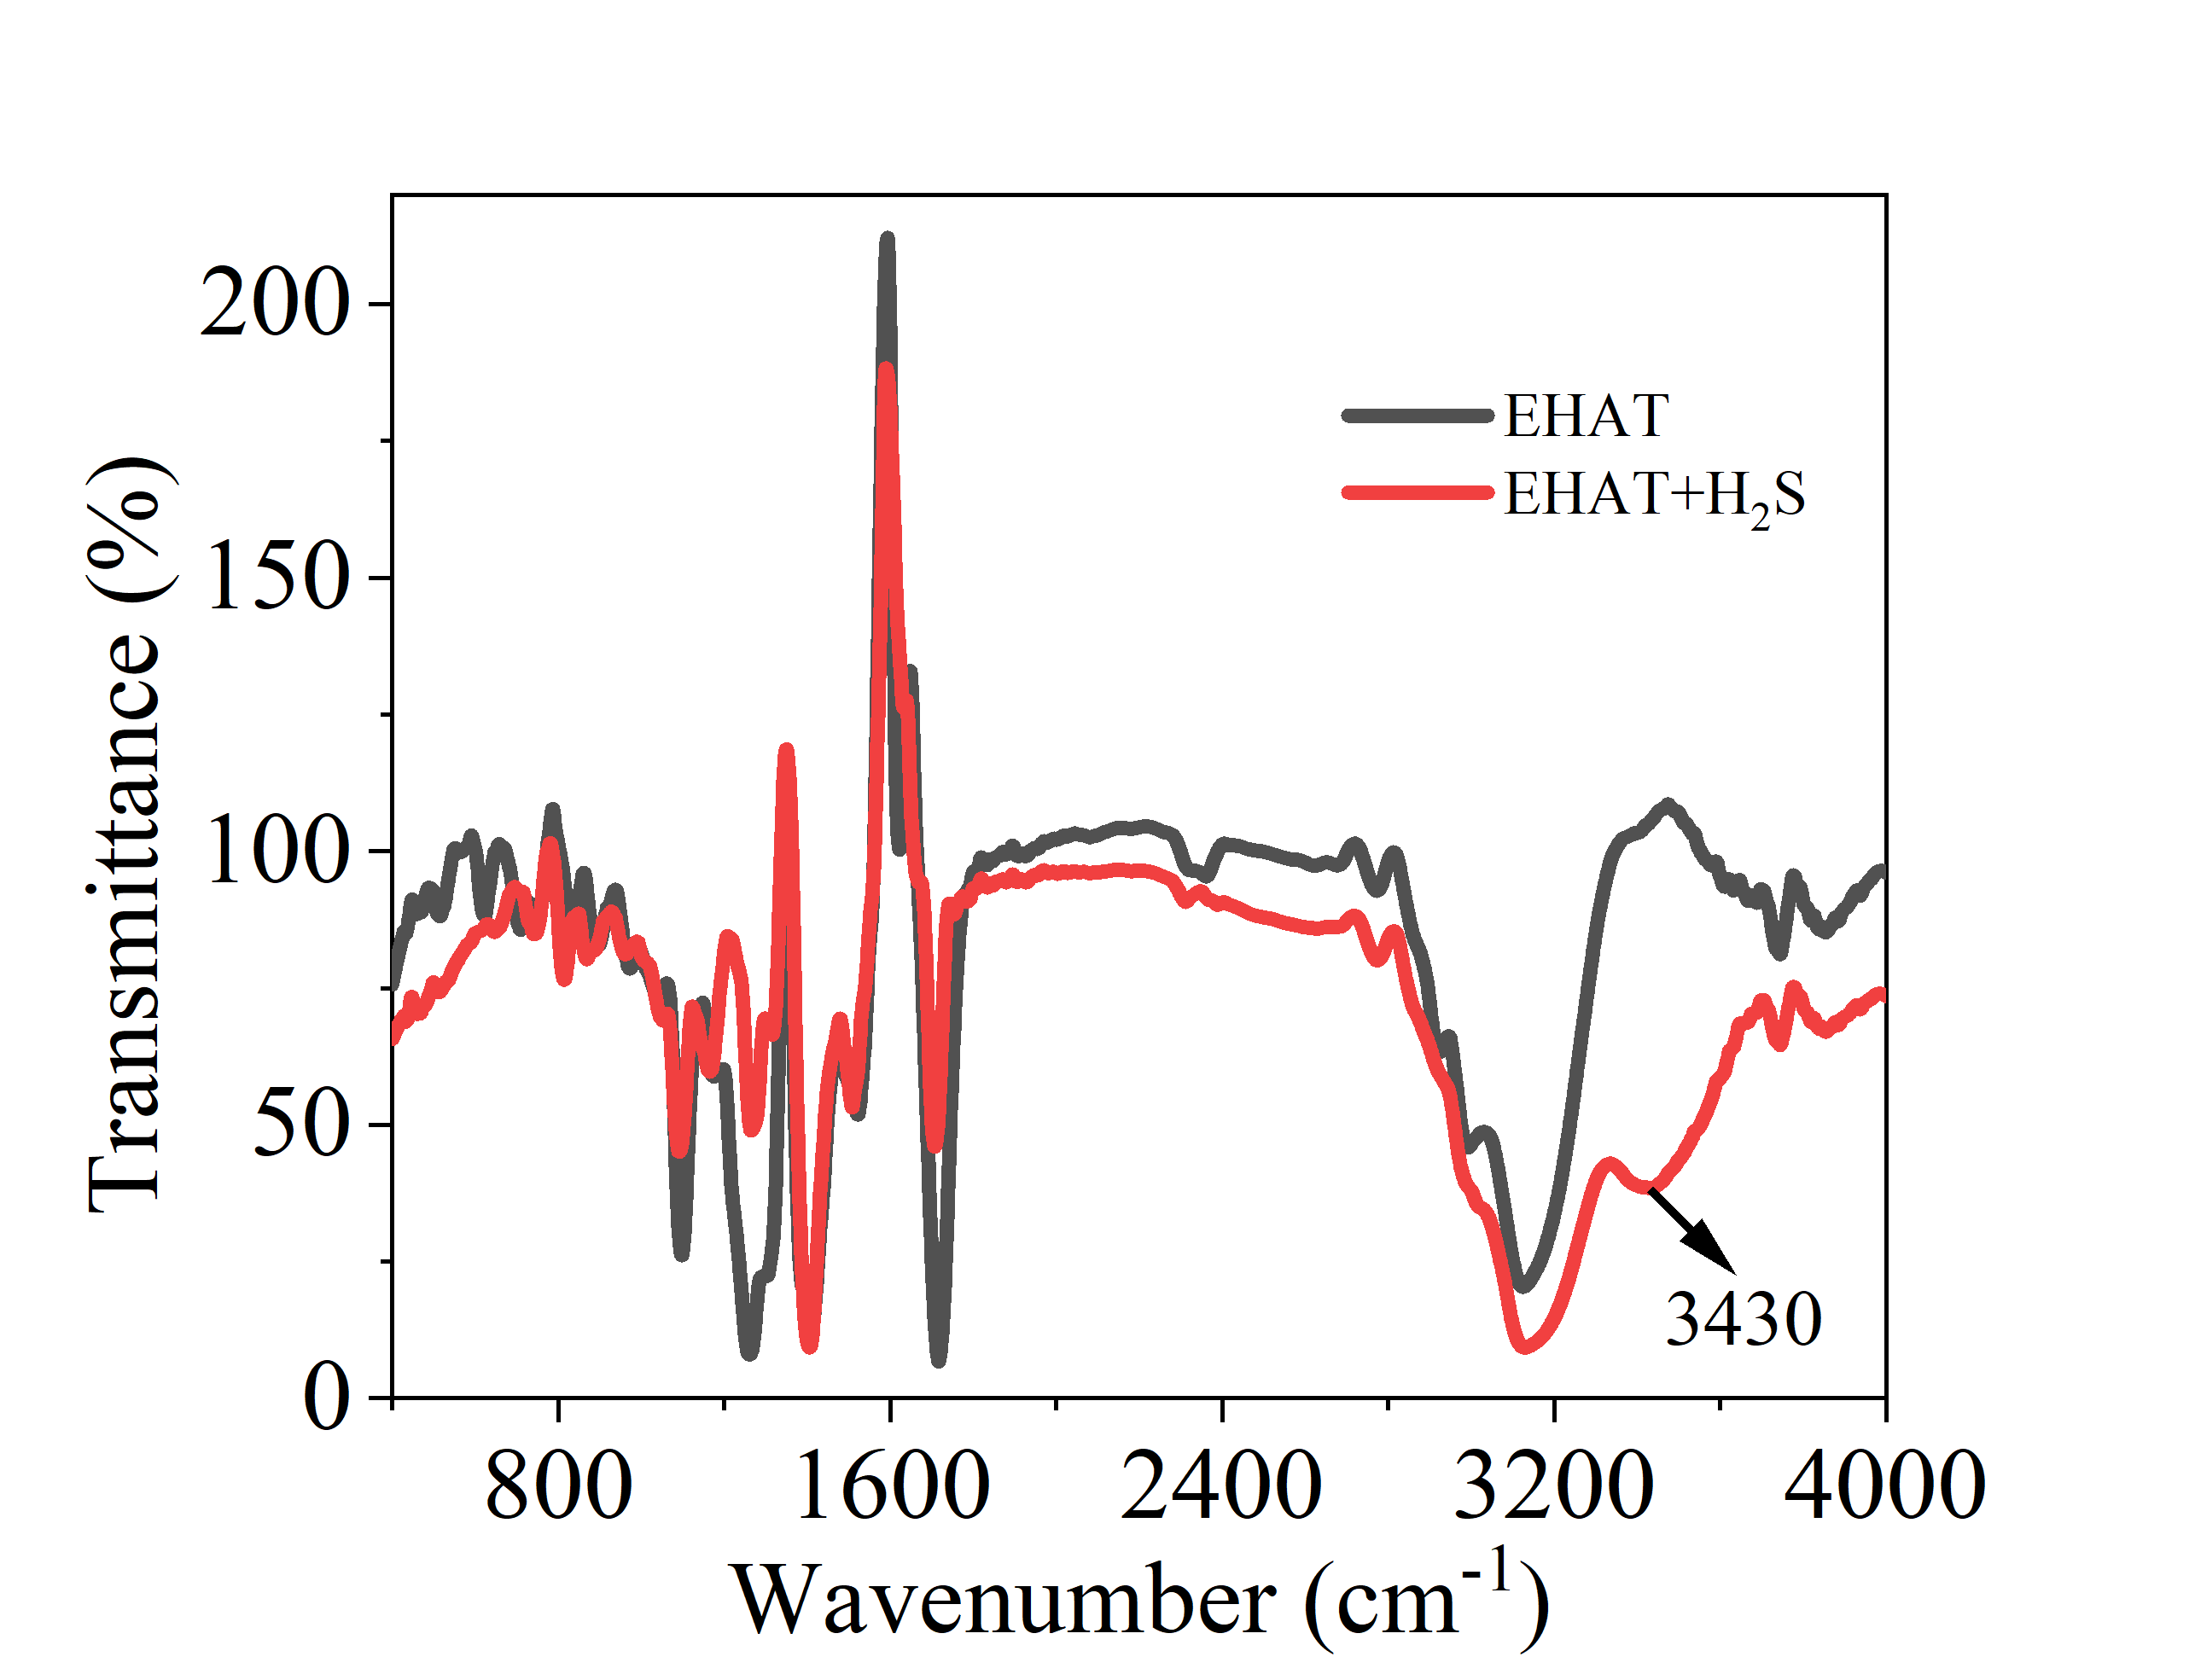


**Fig. S8.** FT-IR spectra of **HNMT** and **HNMT/H2S** system.


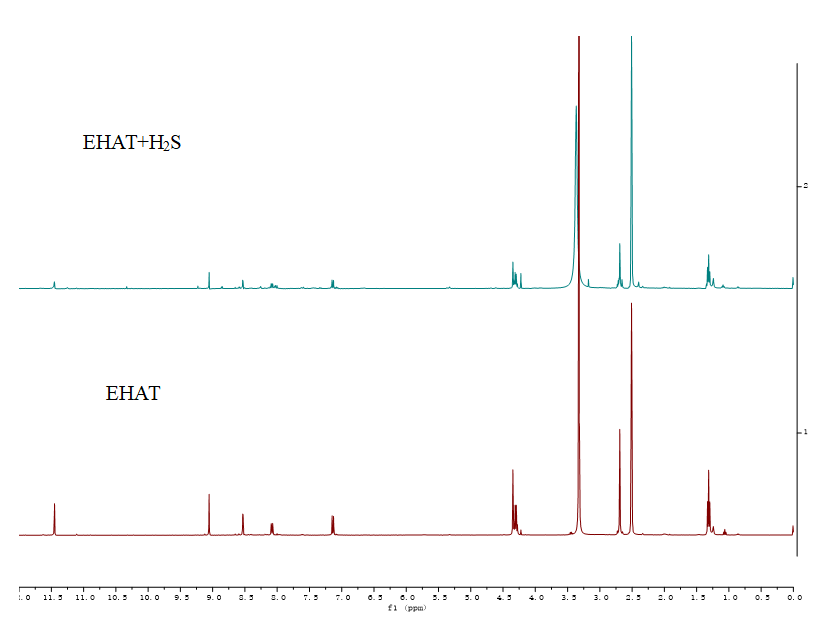


**Fig. S9.** 1H NMR spectra of **EHAT** (line line) and **EHAT/H2S** (red line) system (DMSO-*d*6, 600 MHz).

[EHAT+H2S+H+]

**Fig. S10.** ESI-MS spectrum of **EHAT** (10 μM) upon addition of 5 equiv H2S in EtOH/H2O (1/9, V/V, pH=7.4) mixture.


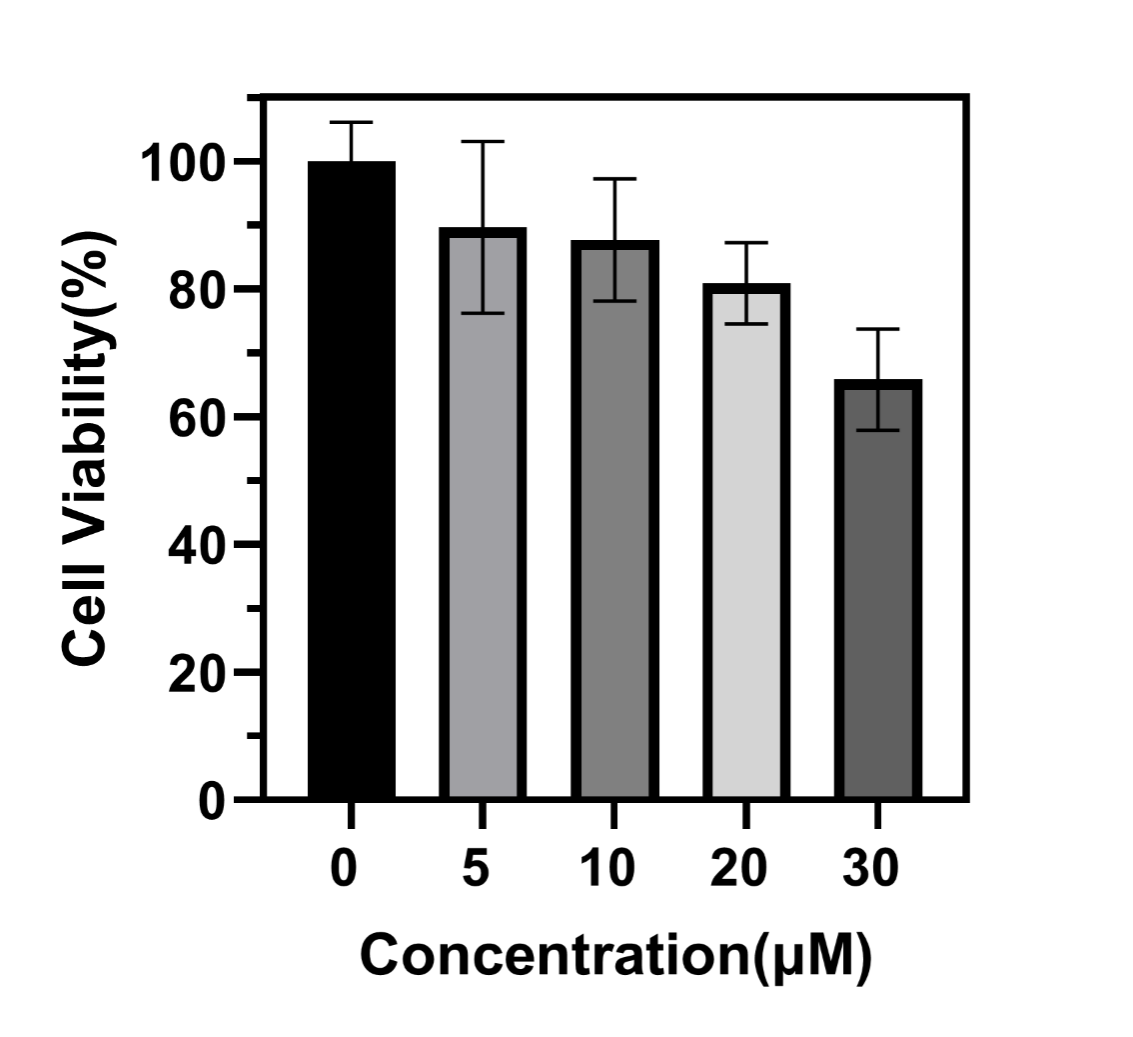


**Fig. S11.** MTT assay to determine the A549 cells viability in different concentrations of probe **EHAT**.
